# Supplementary material for: In situ synthesis of rosette-like Co-doped FeNiOOH/NF for seawater oxidation
Source: Royal Society of Chemistry journal article supplement (doi:10.1039/d3cc04527g), 2023-01-01
Supplement: d3cc04527g1.pdf [file d3cc04527g1.pdf]

## Supporting Information

### In-situ synthesis of rosette-like Co-doped FeNiOOH/NF for seawater oxidation

Mingyuan Shi<sup>a,b</sup>, Tianmi Tang<sup>b</sup>, Liyuan Xiao<sup>b</sup>, Jingyi Han<sup>b</sup>, Xue Bai<sup>b</sup>, Yuhang Sun<sup>a,b</sup>,

Yuanyuan Ma<sup>a,\*</sup>, and Jingqi Guan<sup>b,\*</sup>

<sup>a</sup> College of Chemistry and Chemical Engineering, Qiqihar University, Heilongjiang Province 161006, China. \*E-mail: [mayuanyuan1219@126.com](mailto:mayuanyuan1219@126.com) (Y.Y. Ma)

<sup>b</sup> Institute of Physical Chemistry, College of Chemistry, Jilin University, 2519 Jiefang Road, Changchun 130021, P. R. China. \*E-mail: [guanjq@jlu.edu.cn](mailto:guanjq@jlu.edu.cn) (J.Q. Guan)

### Synthesis of Co<sub>x</sub>-FeNiOOH/NF

Nickel foam (2 cm × 2 cm) was treated in 3 M HCl, distilled water and absolute ethanol for 15 min, respectively. Then, Co(NO<sub>3</sub>)<sub>2</sub>·6H<sub>2</sub>O (0, 0.1, 0.2, 0.4 and 0.6 mmol), 2 mmol Fe(NO<sub>3</sub>)<sub>3</sub>·9H<sub>2</sub>O, 2 mmol Ni(NO<sub>3</sub>)<sub>2</sub>·6H<sub>2</sub>O, 0.24 g NH<sub>2</sub>CONH<sub>2</sub> and 0.075 g PVP were dissolved in 20 mL of H<sub>2</sub>O via ultrasonic treatment. Afterwards, the mixture was transferred into a 25 mL Teflon-lined stainless steel autoclave, and a piece of NF was inserted, which was heated at 100 °C for 12 hours. After natural cooling, the in situ grown NF was washed several times with distilled water and ethanol and dried at 60 °C for 12 h. After drying, the synthesized sample was named Co<sub>x</sub>-FeNiOOH/NF, where x is the molar content of Co.

## Characterization

Powder X-ray diffraction (XRD) patterns were collected using a Shimadzu XRD-6000 with CuK $\alpha$  radiation (40 kV, 30 mA). SEM images were recorded on a HITACHI SU8020 field emission scanning electron microscope. Raman spectra were acquired using a Renishaw micro-Raman spectrometer with a 532 nm laser at 0.2 mW. The valence state was determined using XPS recorded on a Thermo ESCALAB 250Xi. The X-ray source selected was monochromatized Al K $\alpha$  source (15 kV, 10.8 mA). Region scans were collected using a 30 eV pass energy. Peak positions were calibrated relative to C 1s peak position at 284.6 eV.

## Electrochemical measurements

All electrochemical measurements were performed on a CHI760E electrochemical working station at room temperature. The catalysts were measured in 1.0 M KOH aqueous solution using a typical three-electrode configuration. Linear sweep voltammetry (LSV) polarization curves were acquired at a scan rate of 5 mV $\cdot$ s $^{-1}$ . Electrochemical impedance spectroscopy (EIS) measurements were performed at open-circuit potential in the frequency range from 100 kHz to 0.1 Hz with an a.c. perturbation of 5 mV. All potentials measured were calibrated to RHE using the following equation:  $E$  (versus RHE) =  $E$  (versus SCE) + 0.241 V + 0.0591 pH.

The Faradaic efficiency was calculated using the equations:

$$FE = (V/V_m) e N_A Z/Q$$

where  $V$  is the volume of gas (L),  $V_m$  is the standard molar volume (22.4 L mol $^{-1}$ ),  $e$  is the electron charge ( $1.6 \times 10^{-19}$ ),  $N_A$  is the Avogadro number ( $6.02 \times 10^{23}$ ),

Z is the number of electrons needed to form  $O_2$  molecular (for  $O_2$ ,  $Z = 4$ ), and Q is the amount of power consumed during electrolysis (C).

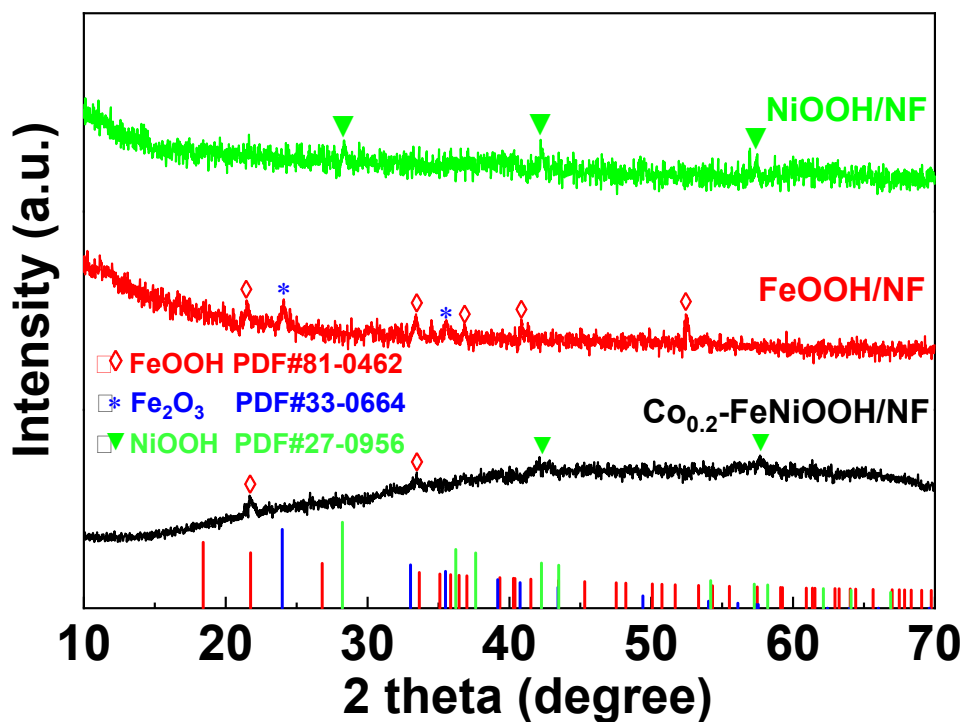

Fig. S1. XRD patterns of NiOOH/NF, FeOOH/NF and Co<sub>0.2</sub>-FeNiOOH/NF.

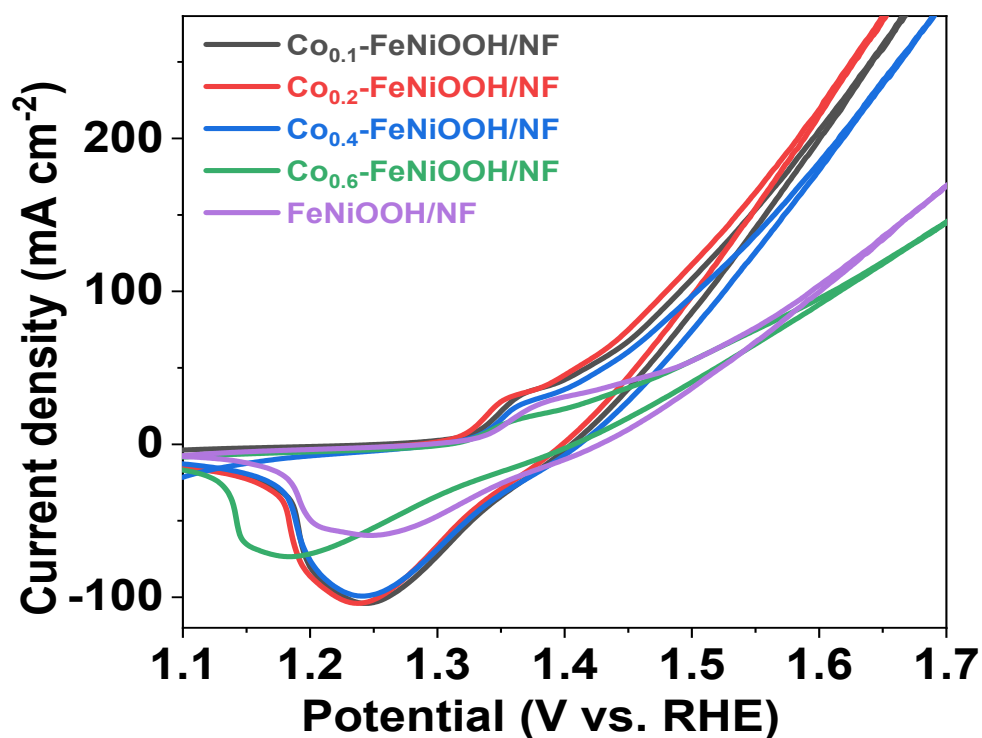

Fig. S2. CV curves of Co<sub>0.1</sub>-FeNiOOH/NF, Co<sub>0.2</sub>-FeNiOOH/NF, Co<sub>0.4</sub>-FeNiOOH/NF, Co<sub>0.6</sub>-FeNiOOH/NF and FeNiOOH/NF at a scan rate of 5 mV/s.

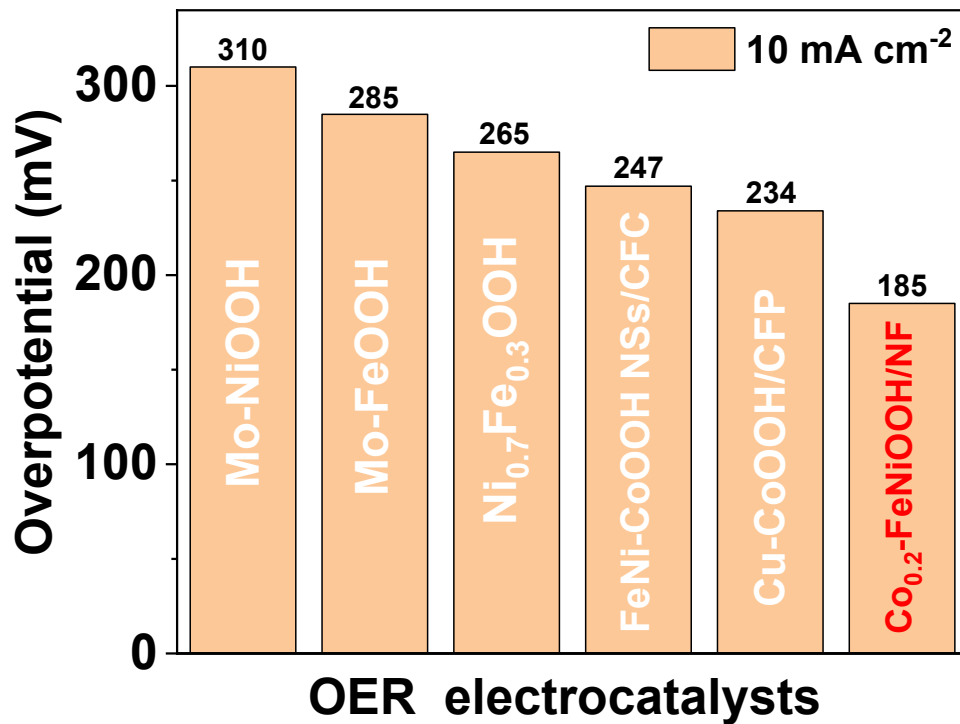

Fig. S3. Overpotential comparison at 10 mA cm<sup>-2</sup>.

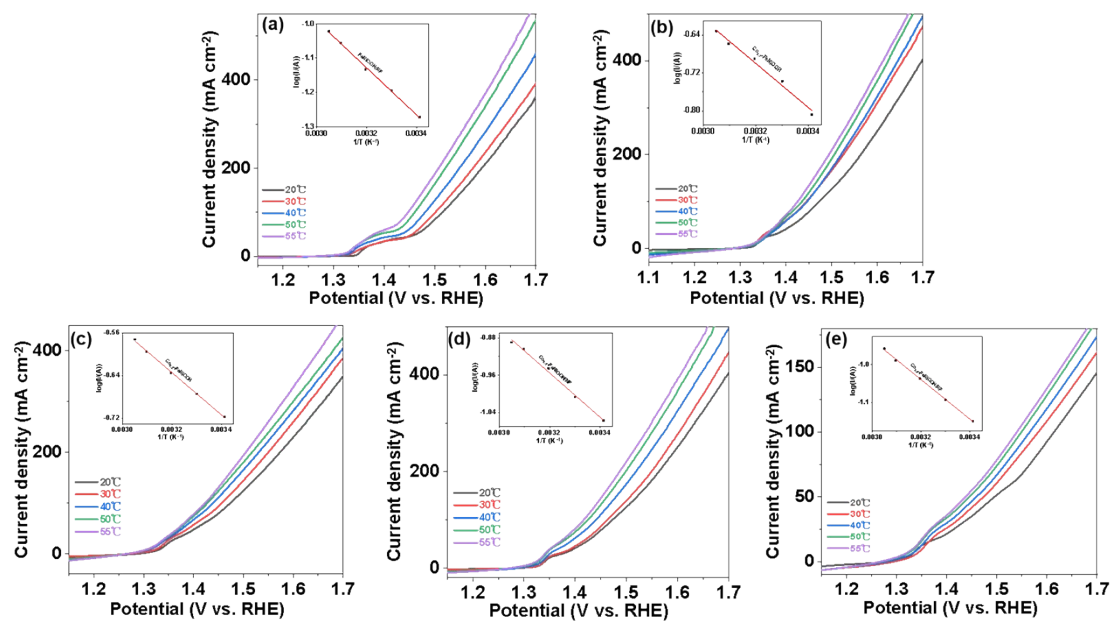

Fig. S4. OER polarization curves of FeNiOOH/NF, Co<sub>0.1</sub>-FeNiOOH/NF, Co<sub>0.2</sub>-FeNiOOH/NF, Co<sub>0.4</sub>-FeNiOOH/NF and Co<sub>0.6</sub>-FeNiOOH/NF in three-electrode configuration in 1 M KOH at 20 °C, 30 °C, 40 °C, 50 °C and 55 °C.

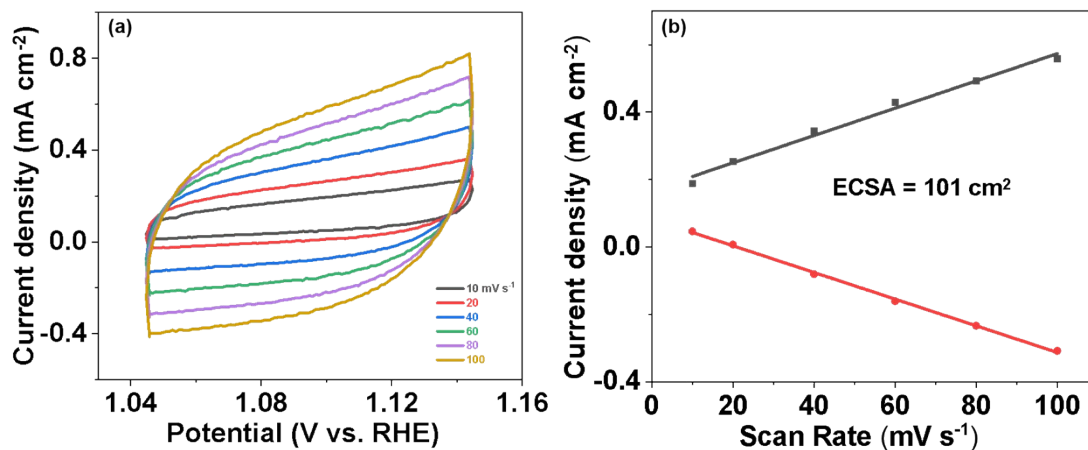

**Fig. S5.** (a) CVs of the  $\text{Co}_{0.2}\text{-FeNiOOH/NF}$  measured in a non-Faradaic region at different scan rate. (b) The cathodic and anodic currents measured as a function of the scan rate.

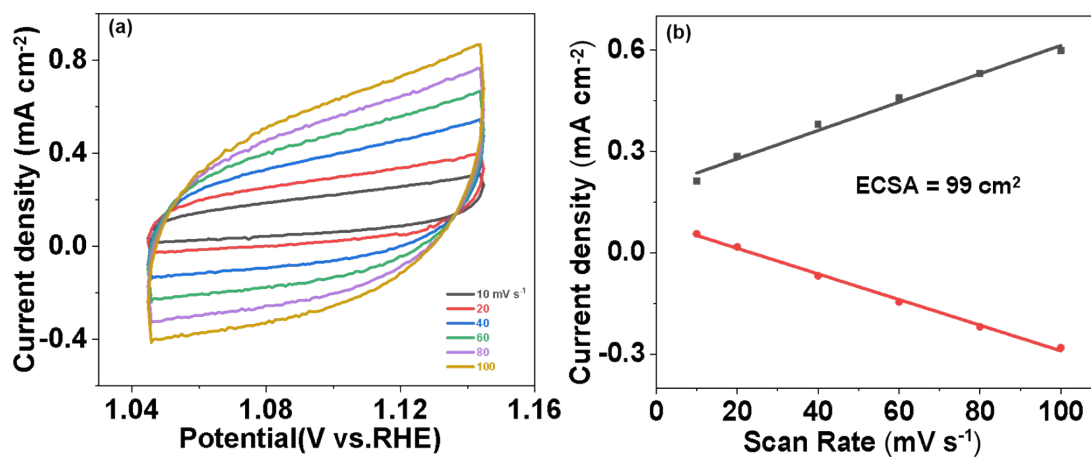

**Fig. S6.** (a) CVs of the  $\text{Co}_{0.1}\text{-FeNiOOH/NF}$  measured in a non-Faradaic region at different scan rate. (b) The cathodic and anodic currents measured as a function of the scan rate.

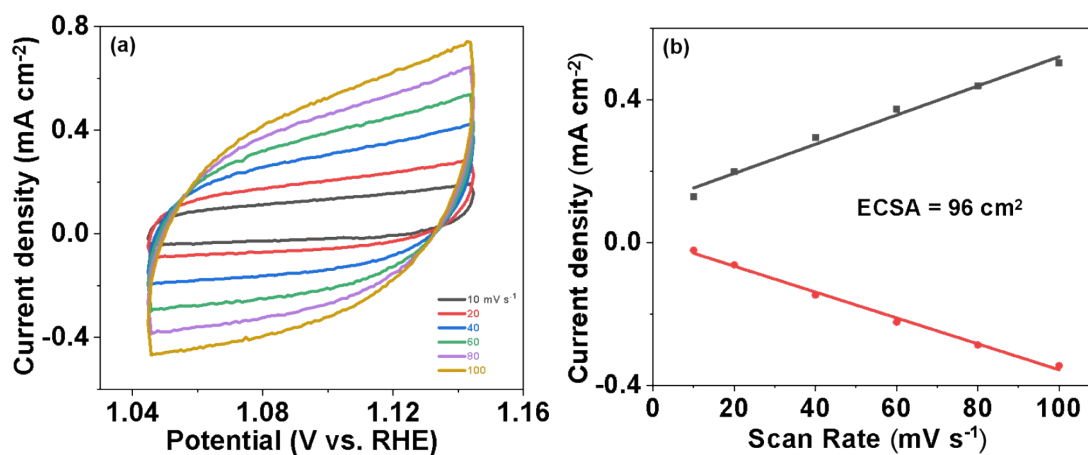

**Fig. S7.** (a) CVs of the Co<sub>0.4</sub>-FeNiOOH/NF measured in a non-Faradaic region at different scan rate. (b) The cathodic and anodic currents measured as a function of the scan rate.

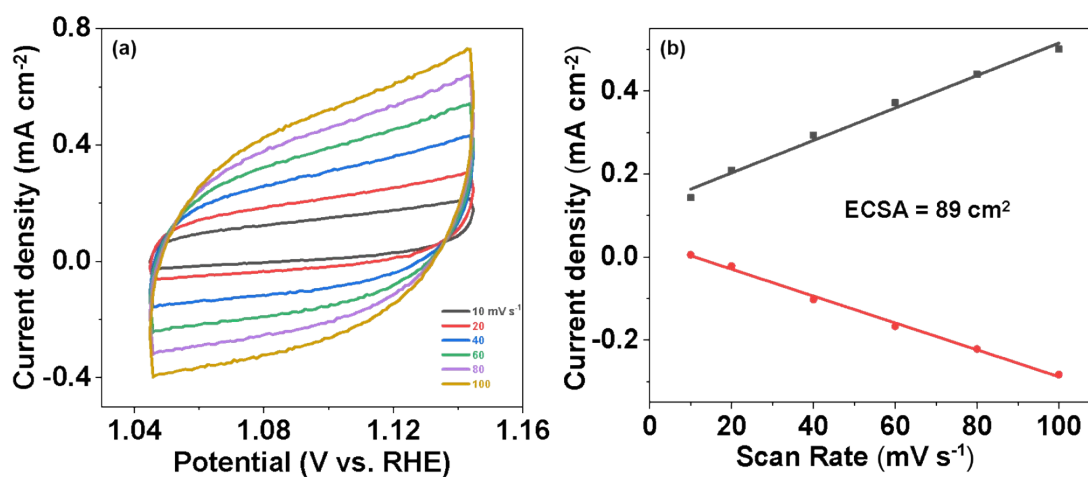

**Fig. S8.** (a) CVs of the Co<sub>0.6</sub>-FeNiOOH/NF measured in a non-Faradaic region at different scan rate. (b) The cathodic and anodic currents measured as a function of the scan rate.

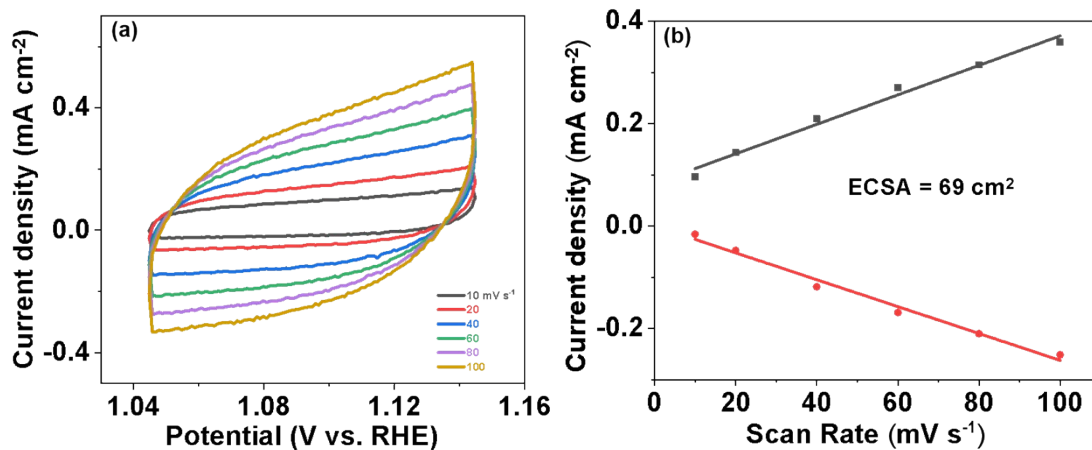

Fig. S9. (a) CVs of the FeNiOOH/NF measured in a non-Faradaic region at different scan rate. (b) The cathodic and anodic currents measured as a function of the scan rate.

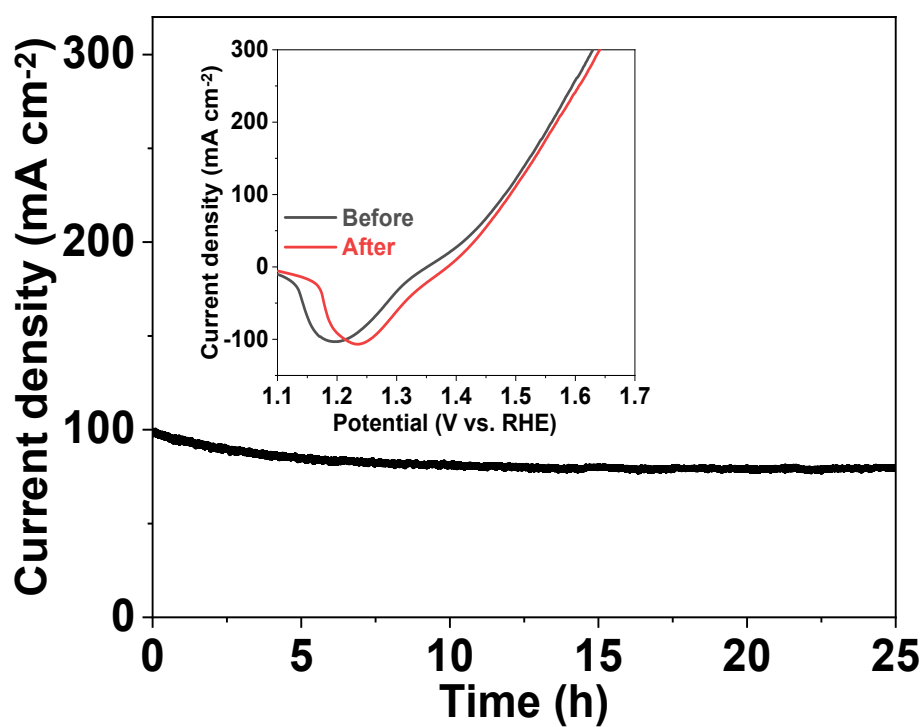

Fig. S10. Chronoamperometric curve of the Co<sub>0.2</sub>-FeNiOOH/NF in 1 M KOH.



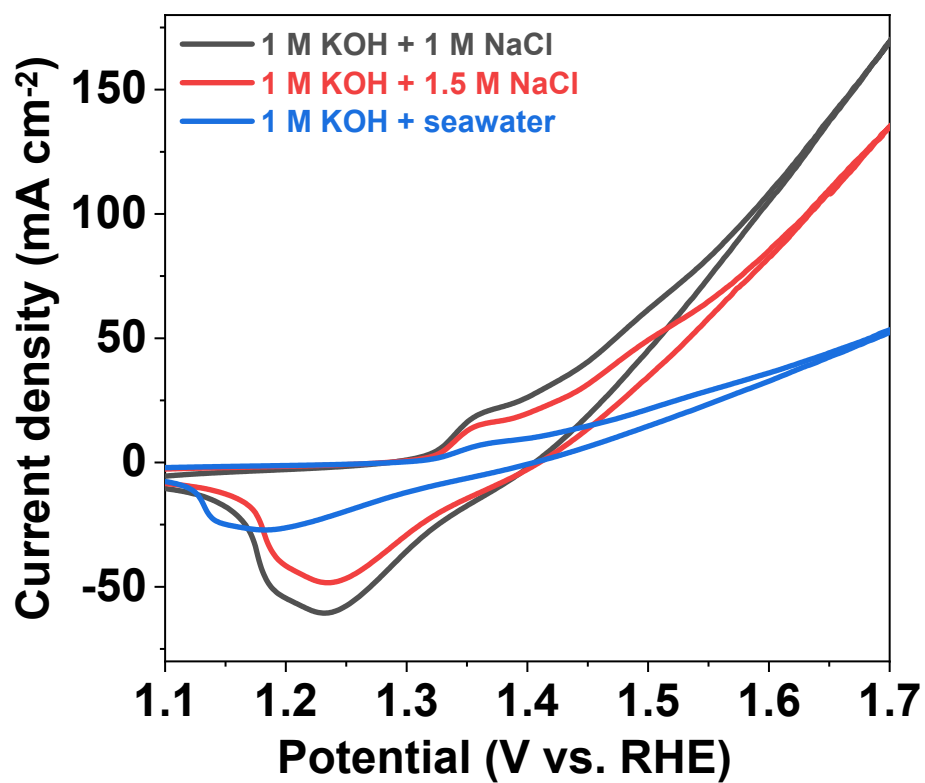

Fig. S11. CV curves of Co<sub>0.2</sub>-FeNiOOH/NF in different electrolytes at 5 mV/s.

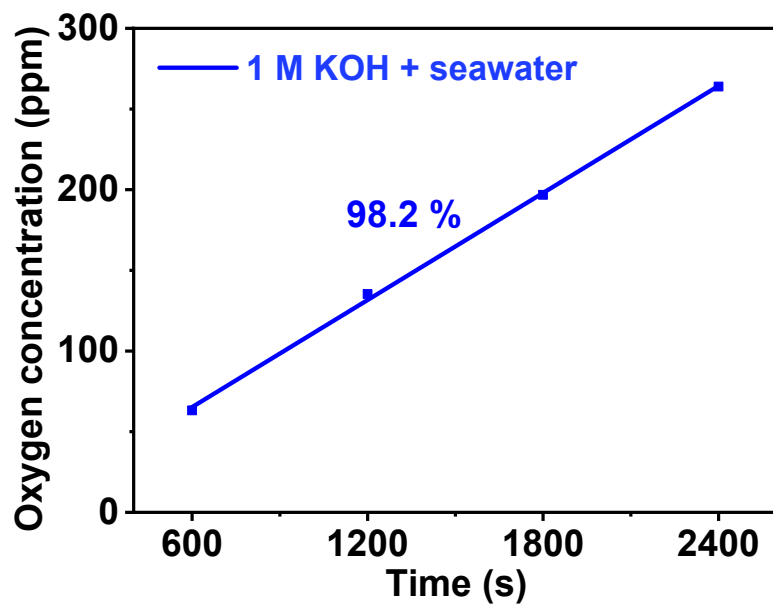

Fig. S12. Faraday efficiency of Co<sub>0.2</sub>-FeNiOOH/NF in 1 M KOH + seawater at 10 mA cm<sup>-2</sup>.

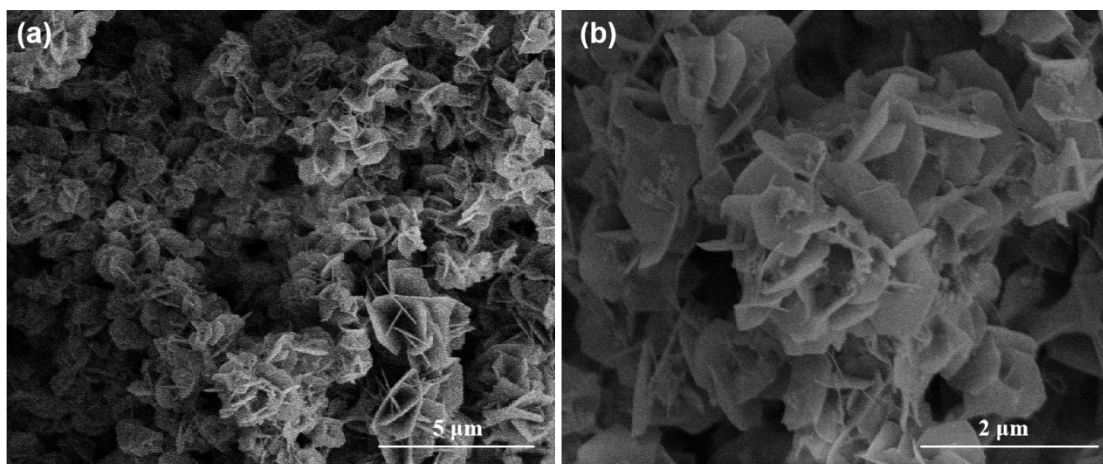

**Fig. S13.** (a, b) SEM images of  $\text{Co}_{0.2}\text{-FeNiOOH/NF}$  after OER testing.

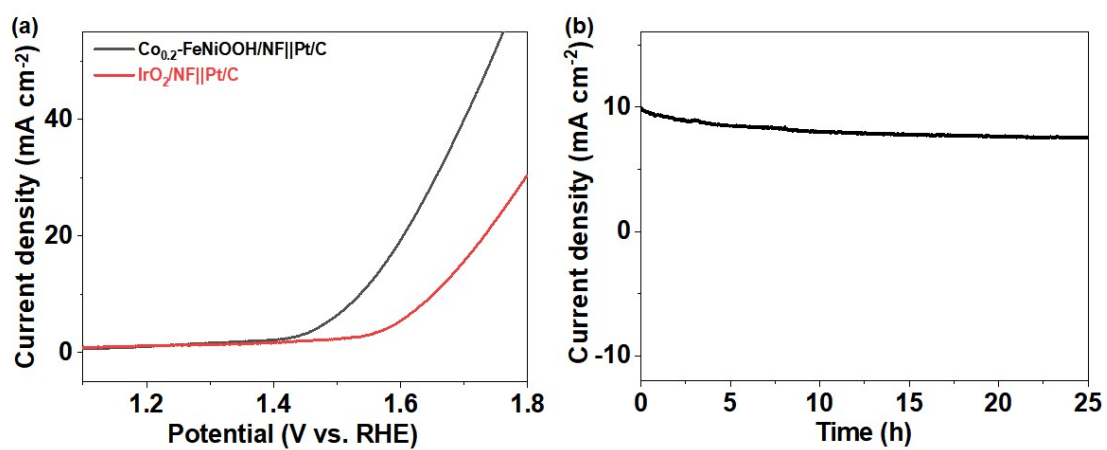

**Fig. S14.** (a) LSV curves of  $\text{Co}_{0.2}\text{-FeNiOOH/NF||Pt/C}$  and  $\text{IrO}_2\text{/NF||Pt/C}$  in overall water splitting. (b) Stability test.
